# Supplementary material
Source: PubMed Central journal article supplement (PMC3038721)
Supplement: 1016367108_pnas.1016367108_SI.pdf [file 1016367108_pnas.1016367108_SI.pdf]

# Supporting Information

Laulicht et al. 10.1073/pnas.1016367108

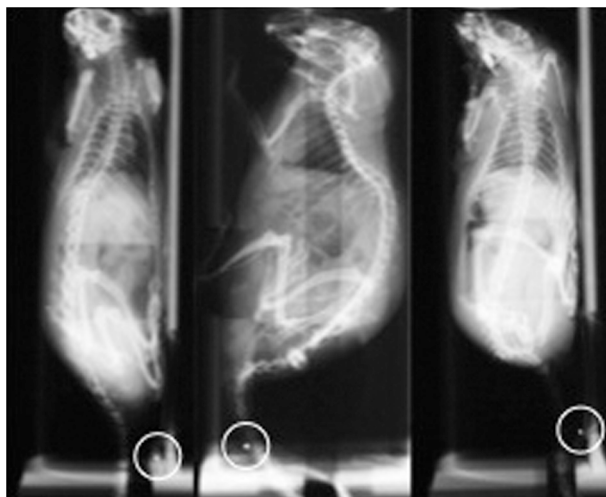

**Fig. S1.** X-ray transit of orally administered magnets. X-ray images taken 12 h after neodymium iron boron (NIB) magnets were orally gavaged to age-matched rats demonstrating that without the application of an external magnetic field the magnets are excreted in accordance with GI transit of a standard oral dose ( $N = 3$ ).

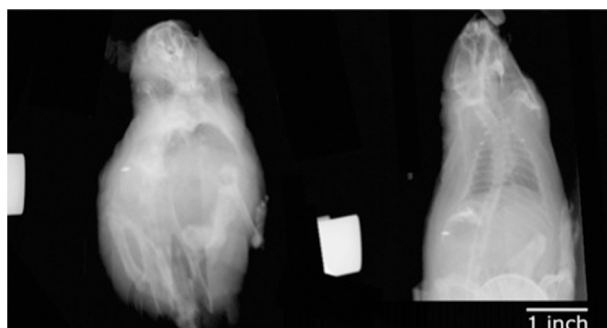

**Movie S1.** Exemplary biplanar fluoroscopic video. Biplanar fluoroscopic videos acquired 4 h after the start of localization as part of a 12 h localization study. The 1 s video is excerpted from 30 s of real-time biplanar fluoroscopic video acquisition. Both of the fluoroscopic cameras (left and right) show the intestinal localization of the magnetic pill diagrammed in Fig. 1B. The internal dosage has a radiopaque cylindrical magnet flanked by less radiopaque iron-loaded alginate spheres. Simultaneous video acquisition from two orthogonal fluoroscopes enabled quantitative three-dimensional motion tracking of the internal and external magnets post hoc.

[Movie S1 \(MOV\)](#)
